# Supplementary material for: A PRDM16-driven signal regulates body composition in testosterone-treated hypogonadal men
Source: PubMed Central journal article supplement (PMC11402695; doi:10.3389/fendo.2024.1426175), 2024-09-02
Supplement: DataSheet1.pdf [file DataSheet1.pdf]

**SUPPLEMENTARY TABLE: KEY RESOURCES**

| REAGENT/RESOURCE                                                  | SOURCE               | IDENTIFIER       |
|-------------------------------------------------------------------|----------------------|------------------|
| <b>Chemicals, Peptides, Metabolites, and Recombinant Proteins</b> |                      |                  |
| RNA Later T                                                       | ThermoFisher         | Cat# AM7020      |
| HPLC-grade water                                                  | ThermoFisher         | Cat# W64         |
| Testosterone-2H3                                                  | Sigma-Aldrich        | Cat# T2655       |
| 2-Mercaptoethanol                                                 | Sigma-Aldrich        | Cat# M6250       |
| Halt Protease Inhibitor Cocktail (100X)                           | ThermoFisher         | Cat# 78430       |
| HEPES                                                             | Biotechne            | Car# 7365-45-9   |
| PBS                                                               | Corning              | Cat# 21-040      |
| <b>Critical Commercial Assays/Machines</b>                        |                      |                  |
| RNeasy Plus Universal Mini Kit                                    | QIAGEN               | Cat# AM1928      |
| TaqMan Universal PCR Master Mix                                   | ThermoFisher         | Cat# 4304437     |
| SuperScript VILO Master Mix                                       | ThermoFischer        | Cat# 11755250    |
| 96 well plate for PCR                                             | Applied Biosystems   | Cat# N8010560    |
| FastPrep 24–5G homogenizer                                        | MP Biomedicals       | Cat # 1606-1026  |
| Nanodrop and Bioanalyzer 2100                                     | Agilent Technologies | Cat# P 275       |
| Real Time PCR system                                              | Applied Biosystem-   | Cat # F272520135 |
| Accuwash                                                          | ThermoFisher         | Cat# 888-7482AF  |
| Digital incubator                                                 | Wards science        | Cat # 03211213   |
| Spectra max Ab plus                                               | Molecular devices    | Cat# ABP 00603   |
| Human Adiponectin ELISA kit                                       | R&D                  | Cat# EZHADP-61K  |
| Human Leptin ELISA kit                                            | R&D                  | Cat # EZHL-805K  |
| Human Follistatin ELISA kit                                       | R&D                  | Cat # DFN00      |
| Human GDF-8/Myostatin Immunoassay                                 | R&D                  | Cat# DGDF80      |
| Human CFD (Adipsin) Elisa kit                                     | ThermoFisher         | Cat# EHCDF       |
| Human PRDM16 Elisa kit                                            | Biomatik             | Cat# EKN52948    |
| Human PAX7 Immunoassay kit                                        | My Biosource         | Cat# MBS2606278  |
| <b>Oligonucleotides</b>                                           |                      |                  |
| Taqman FAM Probe PPAR $\gamma$                                    | ThermoFisher         | Hs01115513_m1    |
| Taqman FAM Probe CEBP $\alpha$                                    | ThermoFisher         | Hs00269972_s1    |
| Taqman FAM Probe LPL                                              | ThermoFisher         | Hs00173425_m1    |
| Taqman FAM Probe PAX7                                             | ThermoFisher         | Hs00242962_m1    |
| Taqman FAM Probe PRDM16                                           | ThermoFisher         | Hs00223161_m1    |
| Taqman FAM Probe MYF5                                             | ThermoFisher         | Hs00929416_g1    |
| Taqman FAM Probe MYOD                                             | ThermoFisher         | Hs00159528_m1    |

|                                                |                          |               |
|------------------------------------------------|--------------------------|---------------|
| Taqman VIC Probe -18s                          | ThermoFisher             | Hs03928990_g1 |
| <b>Software and Algorithms</b>                 |                          |               |
| Quantstudio design and analysis software 1.3.1 | ThermoFisher             | N/A           |
| Endnote version 21                             | Clarivate Analytics      | N/A           |
| Biorender software                             | Toronto, Ontario, Canada | N/A           |
| Graph pad prism software 9.0                   | Dotmatics, CA, USA       | N/A           |
